# Supplementary material for: T3SS translocon induces pyroptosis by direct interaction with NLRC4/NAIP inflammasome
Source: eLife journal article supplement (doi:10.7554/elife.100820), 2024-08-29

Figure 4G – source data-annotated

|                 |   |   |   |   |   |   |   |
|-----------------|---|---|---|---|---|---|---|
| Flag-NLRC4      | - | + | + | + | + | - | + |
| HA-NAIP         | - | - | + | + | + | + | - |
| proCap1         | - | - | - | + | + | + | + |
| Myc-EseB        | - | - | - | - | + | + | + |
| proIL-1 $\beta$ | - | + | + | + | + | + | + |

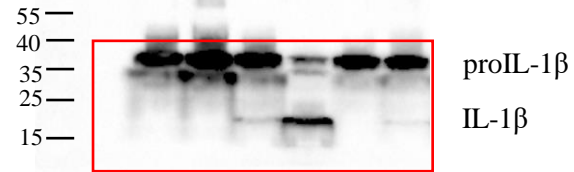

|                 |   |   |   |   |   |   |   |
|-----------------|---|---|---|---|---|---|---|
| Flag-NLRC4      | - | + | + | + | + | - | + |
| HA-NAIP         | - | - | + | + | + | + | - |
| proCap1         | - | - | - | + | + | + | + |
| Myc-EseB        | - | - | - | - | + | + | + |
| proIL-1 $\beta$ | - | + | + | + | + | + | + |

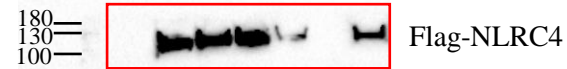

|                 |   |   |   |   |   |   |   |
|-----------------|---|---|---|---|---|---|---|
| Flag-NLRC4      | - | + | + | + | + | - | + |
| HA-NAIP         | - | - | + | + | + | + | - |
| proCap1         | - | - | - | + | + | + | + |
| Myc-EseB        | - | - | - | - | + | + | + |
| proIL-1 $\beta$ | - | + | + | + | + | + | + |

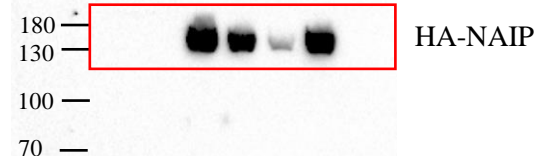

|                 |   |   |   |   |   |   |   |
|-----------------|---|---|---|---|---|---|---|
| Flag-NLRC4      | - | + | + | + | + | - | + |
| HA-NAIP         | - | - | + | + | + | + | - |
| proCap1         | - | - | - | + | + | + | + |
| Myc-EseB        | - | - | - | - | + | + | + |
| proIL-1 $\beta$ | - | + | + | + | + | + | + |

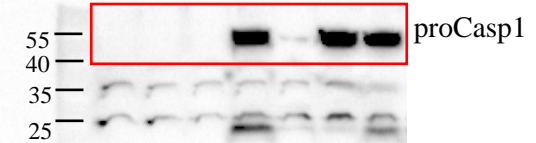

|                 |   |   |   |   |   |   |   |
|-----------------|---|---|---|---|---|---|---|
| Flag-NLRC4      | - | + | + | + | + | - | + |
| HA-NAIP         | - | - | + | + | + | + | - |
| proCap1         | - | - | - | + | + | + | + |
| Myc-EseB        | - | - | - | - | + | + | + |
| proIL-1 $\beta$ | - | + | + | + | + | + | + |

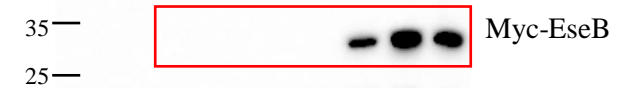

|                 |   |   |   |   |   |   |   |
|-----------------|---|---|---|---|---|---|---|
| Flag-NLRC4      | - | + | + | + | + | - | + |
| HA-NAIP         | - | - | + | + | + | + | - |
| proCap1         | - | - | - | + | + | + | + |
| Myc-EseB        | - | - | - | - | + | + | + |
| proIL-1 $\beta$ | - | + | + | + | + | + | + |

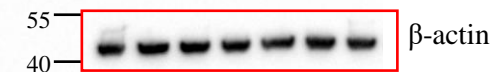

Supplement: fig4-data3 [file elife-100820-fig4-data3-v1.pdf]
