# Supplementary material for: T3SS translocon induces pyroptosis by direct interaction with NLRC4/NAIP inflammasome
Source: eLife journal article supplement (doi:10.7554/elife.100820), 2024-08-29

Figure 4—figure supplement 1— source data-annotated

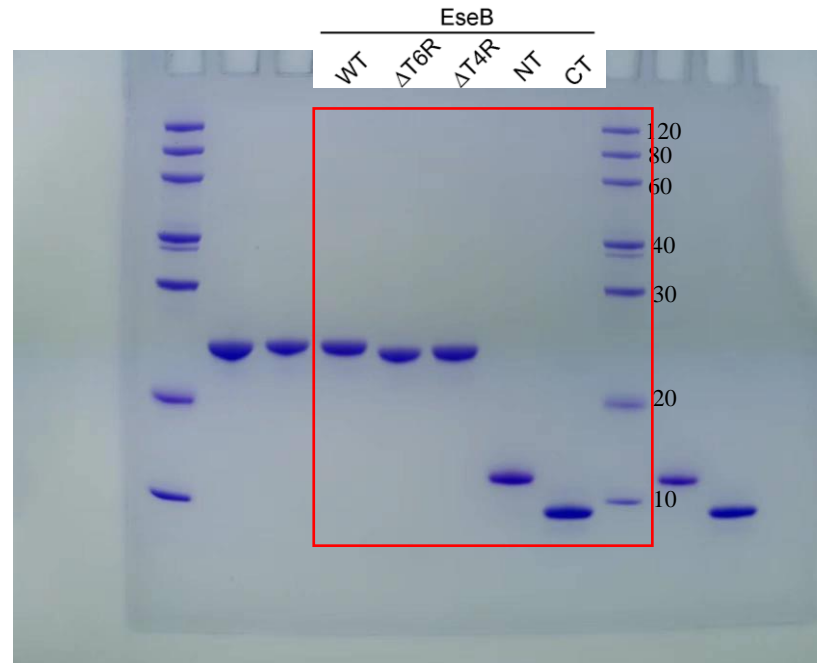

Supplement: fig4-figsupp1-data1 [file elife-100820-fig4-figsupp1-data1-v1.pdf]
