# Supplementary material for: T3SS translocon induces pyroptosis by direct interaction with NLRC4/NAIP inflammasome
Source: eLife journal article supplement (doi:10.7554/elife.100820), 2024-08-29

Figure 5C – source data-annotated

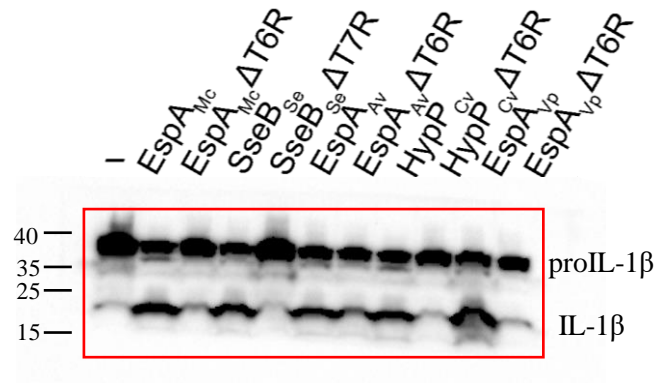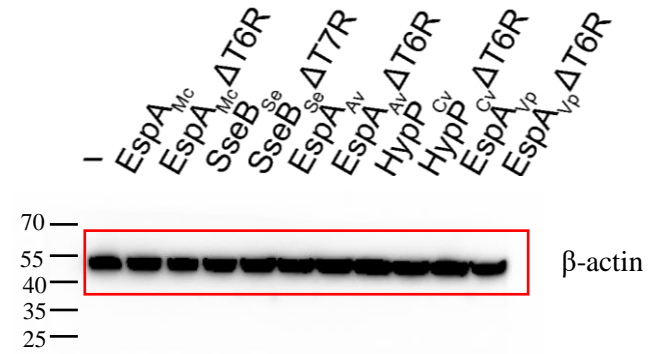

Supplement: fig5-data3 [file elife-100820-fig5-data3-v1.pdf]
