# Supplementary material for: T3SS translocon induces pyroptosis by direct interaction with NLRC4/NAIP inflammasome
Source: eLife. 2025 Feb 14;13:RP100820. doi: 10.7554/eLife.100820 (PMC11828483; doi:10.7554/eLife.100820)
Supplement: Figure 1—figure supplement 1—source data 1. [file elife-100820-fig1-figsupp1-data1.xlsx]

## Sheet: Sheet1
Figure 1—figure supplement 1A											Figure 1—figure supplement 1B
	Cell death (%)										CFU
		-	E. tarda	CytoB+E. tarda	CytoD+E. tarda							-	E. tarda	CytoB+E. tarda	CytoD+E. tarda
	Rep.1	2.97398	42.4854	3.87679	3.02708						Rep.1	0	80520	48	120
	Rep.2	3.55815	39.7238	1.69942	5.09825						Rep.2	0	81840	72	120
	Rep.3	0	41.9012	3.1333	4.30165						Rep.3	0	67320	168	144
	Mean	2.177	41.37	2.903	4.142						Mean	0	76560	96	128
	Std. Deviation	1.908	1.455	1.107	1.045						Std. Deviation	0	8029	63.5	13.86
One-way ANOVA	Dunnett's multiple comparisons test	Mean Diff.	95.00% CI of diff.	Below threshold?	Summary	Adjusted P Value				One-way ANOVA	Dunnett's multiple comparisons test	Mean Diff.	95.00% CI of diff.	Below threshold?	Summary	Adjusted P Value
	E. tarda vs. -	39.19	35.85 to 42.53	Yes	****	<0.0001					E. tarda vs. CytoB+E. tarda	76464	65627 to 87301	Yes	****	<0.0001
	E. tarda vs. CytoB+E. tarda	38.47	35.13 to 41.81	Yes	****	<0.0001					E. tarda vs. CytoD+E. tarda	76432	65595 to 87269	Yes	****	<0.0001
	E. tarda vs. CytoD+E. tarda	37.23	33.89 to 40.57	Yes	****	<0.0001
