# Supplementary material for: T3SS translocon induces pyroptosis by direct interaction with NLRC4/NAIP inflammasome
Source: eLife. 2025 Feb 14;13:RP100820. doi: 10.7554/eLife.100820 (PMC11828483; doi:10.7554/eLife.100820)
Supplement: Figure 1—source data 3. [file elife-100820-fig1-data3.xlsx]

## Sheet: Figure 1
	Figure 1C									Figure 1D
		Cell death (%)								IL-1β (pg/ml)
		E. tarda	-	2 h	4 h					E. tarda	-	2 h	4 h
		Rep. 1	0	13.3368	23.3264					Rep. 1	50.4859	175.5	360.75
		Rep. 2	0.209205	12.9707	21.4435					Rep. 2	37.4337	165.75	339.083
		Rep. 3	0.104603	12.9184	22.5418					Rep. 3	30.6466	178.75	413.833
		Mean	0.1046	13.08	22.44					Mean	39.52	173.3	371.2
		Std. Deviation	0.1046	0.228	0.9458					Std. Deviation	10.08	6.765	38.46
Figure 1F
	Cell death (%)
	E. tarda	-						2 h						4 h
		WT	Aim2-KO	NLRC4-KO	ASC-KO	Casp4-KO	GSDMD-KO	WT	Aim2-KO	NLRC4-KO	ASC-KO	Casp4-KO	GSDMD-KO	WT	Aim2-KO	NLRC4-KO	ASC-KO	Casp4-KO	GSDMD-KO
	Rep. 1	1.90144	1.25	4.60848	0	2.65896	3.52456	16.4532	20.9722	6.19902	4.20937	6.51252	2.3622	29.8797	31.4236	19.168	13.7262	14.1041	2.21222
	Rep. 2	0	1.04167	1.71289	2.81845	3.08285	0.862392	16.3368	16.9097	6.9739	7.79649	5.97302	2.62467	31.4707	31.6667	20.8809	12.5183	14.7977	2.84964
	Rep. 3	1.28056	0	0	0.878477	0	1.72478	15.6771	20.0694	9.46166	6.55198	6.55106	0	30.1125	32.3958	23.0832	13.8726	12.6397	2.88714
	Mean	1.061	0.7639	2.107	1.232	1.914	2.037	16.16	19.32	7.545	6.186	6.346	1.662	30.49	31.83	21.04	13.37	13.85	2.65
	Std. Deviation	0.9696	0.6697	2.329	1.442	1.671	1.358	0.4185	2.133	1.705	1.821	0.3232	1.446	0.8593	0.506	1.963	0.7433	1.102	0.3793
	One-way ANOVA	Dunnett's multiple comparisons test	Mean Diff.	95.00% CI of diff.	Below threshold?	Summary	Adjusted P Value
		2 h WT vs. Aim2-KO	-3.161	-6.667 to 0.3447	No	ns	0.0821
		2 h WT vs. NLRC4-KO	8.611	5.105 to 12.12	Yes	****	<0.0001
		2 h WT vs. ASC-KO	9.97	6.464 to 13.48	Yes	****	<0.0001
		2 h WT vs. Casp4-KO	9.81	6.304 to 13.32	Yes	****	<0.0001
		2 h WT vs. GSDMD-KO	14.49	10.99 to 18.00	Yes	****	<0.0001
	One-way ANOVA	Dunnett's multiple comparisons test	Mean Diff.	95.00% CI of diff.	Below threshold?	Summary	Adjusted P Value
		4 h WT vs. Aim2-KO	-1.341	-3.855 to 1.173	No	ns	0.4313
		4 h WT vs. NLRC4-KO	9.444	6.930 to 11.96	Yes	****	<0.0001
		4 h WT vs. ASC-KO	17.12	14.60 to 19.63	Yes	****	<0.0001
		4 h WT vs. Casp4-KO	16.64	14.13 to 19.15	Yes	****	<0.0001
		4 h WT vs. GSDMD-KO	27.84	25.32 to 30.35	Yes	****	<0.0001
Figure 1G
	IL-1β (pg/ml)
	E. tarda	-						2 h						4 h
		WT	Aim2-KO	NLRC4-KO	ASC-KO	Casp4-KO	GSDMD-KO	WT	Aim2-KO	NLRC4-KO	ASC-KO	Casp4-KO	GSDMD-KO	WT	Aim2-KO	NLRC4-KO	ASC-KO	Casp4-KO	GSDMD-KO
	Rep. 1	37.4337	41.6104	41.6104	40.0442	37.4337	39.5221	122.417	117	56.2289	42.6546	47.3534	39.5221	299	292.5	67.1928	50.4859	72.4137	43.1767
	Rep. 2	39.5221	39	41.6104	39.5221	38.4779	44.743	96.4167	98.5833	52.5743	41.6104	51.008	37.4337	339.083	302.25	79.7229	48.3976	77.1124	44.743
	Rep. 3	41.6104	40.0442	40.0442	40.0442	44.2209	41.6104	115.917	117	53.6185	40.5663	49.9639	42.1325	319.583	325	79.7229	48.3976	75.0241	46.8313
	Mean	39.52	40.22	41.09	39.87	40.04	41.96	111.6	110.9	54.14	41.61	49.44	39.7	319.2	306.6	75.55	49.09	74.85	44.92
	Std. Deviation	2.088	1.314	0.9043	0.3014	3.655	2.628	13.53	10.63	1.882	1.044	1.882	2.354	20.04	16.68	7.234	1.206	2.354	1.834
	One-way ANOVA	Dunnett's multiple comparisons test	Mean Diff.	95.00% CI of diff.	Below threshold?	Summary	Adjusted P Value
		2 h WT vs. Aim2-KO	0.7222	-16.30 to 17.75	No	ns	>0.9999
		2 h WT vs. NLRC4-KO	57.44	40.42 to 74.47	Yes	****	<0.0001
		2 h WT vs. ASC-KO	69.97	52.95 to 87.00	Yes	****	<0.0001
		2 h WT vs. Casp4-KO	62.14	45.12 to 79.17	Yes	****	<0.0001
		2 h WT vs. GSDMD-KO	71.89	54.86 to 88.91	Yes	****	<0.0001
	One-way ANOVA	Dunnett's multiple comparisons test	Mean Diff.	95.00% CI of diff.	Below threshold?	Summary	Adjusted P Value
		4 h WT vs. Aim2-KO	12.64	-13.72 to 38.99	No	ns	0.5239
		4 h WT vs. NLRC4-KO	243.7	217.3 to 270.0	Yes	****	<0.0001
		4 h WT vs. ASC-KO	270.1	243.8 to 296.5	Yes	****	<0.0001
		4 h WT vs. Casp4-KO	244.4	218.0 to 270.7	Yes	****	<0.0001
		4 h WT vs. GSDMD-KO	274.3	248.0 to 300.7	Yes	****	<0.0001
Figure 1H	Cell death (%)
	E. tarda	-			2 h			4 h
		Null	NLRP3-KD	Casp1-KD	Null	NLRP3-KD	Casp1-KD	Null	NLRP3-KD	Casp1-KD
	Rep. 1	1.08983	3.99454	0.189394	13.0779	12.0519	6.09217	26.9815	23.4551	16.1616
	Rep. 2	1.321	0	1.42046	14.2338	11.6422	4.00884	25.7596	22.2602	16.6035
	Rep. 3	0	2.49232	0	12.3844	9.55958	4.76641	26.6843	22.8747	15.7513
	Mean	0.8036	2.162	0.5366	13.23	11.08	4.956	26.48	22.86	16.17
	Std. Deviation	0.7055	2.018	0.7713	0.9343	1.336	1.055	0.6373	0.5976	0.4262
	One-way ANOVA	Dunnett's multiple comparisons test	Mean Diff.	95.00% CI of diff.	Below threshold?	Summary	Adjusted P Value
		2 h Null vs. NLRP3-KD	2.148	-0.4734 to 4.768	No	ns	0.0982
		2 h Null vs. Casp1-KD	8.276	5.655 to 10.90	Yes	***	0.0002
	One-way ANOVA	Dunnett's multiple comparisons test	Mean Diff.	95.00% CI of diff.	Below threshold?	Summary	Adjusted P Value
		4 h Null vs. NLRP3-KD	3.612	2.300 to 4.924	Yes	***	0.0004
		4 h Null vs. Casp1-KD	10.3	8.991 to 11.61	Yes	****	<0.0001
Figufe 1I	IL-1β (pg/ml)
	E. tarda	-			2 h			4 h
		Null	NLRP3-KD	Casp1-KD	Null	NLRP3-KD	Casp1-KD	Null	NLRP3-KD	Casp1-KD
	Rep. 1	23.3614	22.5181	24.2048	105.169	91.6747	28.4217	337.75	211.75	40.2289
	Rep. 2	24.2048	41.9157	24.2048	104.325	88.3012	30.9518	281.75	155.75	43.6024
	Rep. 3	25.8916	22.5181	25.0482	98.4217	98.4217	29.2651	292.25	185.5	43.6024
	Mean	24.49	28.98	24.49	102.6	92.8	29.55	303.9	184.3	42.48
	Std. Deviation	1.288	11.2	0.4869	3.676	5.153	1.288	29.77	28.02	1.948
	One-way ANOVA	Dunnett's multiple comparisons test	Mean Diff.	95.00% CI of diff.	Below threshold?	Summary	Adjusted P Value
		2 h Null vs. NLRP3-KD	9.839	1.121 to 18.56	Yes	*	0.0314
		2 h Null vs. Casp1-KD	73.09	64.37 to 81.81	Yes	****	<0.0001
	One-way ANOVA	Dunnett's multiple comparisons test	Mean Diff.	95.00% CI of diff.	Below threshold?	Summary	Adjusted P Value
		4 h Null vs. NLRP3-KD	119.6	64.35 to 174.8	Yes	**	0.0015
		4 h Null vs. Casp1-KD	261.4	206.2 to 316.7	Yes	****	<0.0001
