# Supplementary material for: T3SS translocon induces pyroptosis by direct interaction with NLRC4/NAIP inflammasome
Source: eLife. 2025 Feb 14;13:RP100820. doi: 10.7554/eLife.100820 (PMC11828483; doi:10.7554/eLife.100820)
Supplement: Figure 2—figure supplement 1—source data 3. [file elife-100820-fig2-figsupp1-data3.xlsx]

## Sheet: Sheet1
	Cell death (%)			2 h		4 h
		E.tarda	-	WT	ΔeseB-D	WT	ΔeseB-D
		Rep.1	3.73629	16.8777	0.82511	35.0959	0.679825
		Rep.2	0	16.0581	1.17599	37.6864	2.59046
		Rep.3	0.233004	15.0027	0.814145	40.8059	1.21162
		Mean	1.323	15.98	0.9384	37.86	1.494
		Std. Deviation	2.093	0.94	0.2058	2.859	0.9861
