# Supplementary material for: T3SS translocon induces pyroptosis by direct interaction with NLRC4/NAIP inflammasome
Source: eLife. 2025 Feb 14;13:RP100820. doi: 10.7554/eLife.100820 (PMC11828483; doi:10.7554/eLife.100820)
Supplement: Figure 2—figure supplement 2—source data 3. [file elife-100820-fig2-figsupp2-data3.xlsx]

## Sheet: Sheet1
	Figure 2—figure supplement 2A						Figure 2—figure supplement 2B						Figure 2—figure supplement 2C
	CFU						CFU
			WT	ΔfliC					WT	ΔfliC			Cell death (%)			2 h		4 h
		Rep.1	73700	100100				Rep.1	1353000	1265000				E. tarda	-	WT	ΔfliC	WT	ΔfliC
		Rep.2	119900	96800				Rep.2	1661000	1155000				Rep.1	0	8.74423	9.05721	18.2105	13.3538
		Rep.3	110000	128700				Rep.3	957000	1474000				Rep.2	3.05568	8.71129	8.23633	19.7233	18.2133
														Rep.3	0.337689	9.66121	8.67011	17.3484	18.5208
		Mean	101200	108533				Mean	1323667	1298000
		Std. Deviation	24325	17543				Std. Deviation	352915	162040				Mean	1.131	9.039	8.655	18.43	16.7
														Std. Deviation	1.675	0.5392	0.4107	1.202	2.898
		ΔfliC	Unpaired t test					ΔfliC	Unpaired t test
		vs.	P value	0.6937				vs.	P value	0.9144				2 h	ΔfliC	Unpaired t test			4 h	ΔfliC	Unpaired t test
		WT	P value summary	ns				WT	P value summary	ns					vs.	P value	0.3816			vs.	P value	0.3933
			Significantly different (P < 0.05)?	No					Significantly different (P < 0.05)?	No					WT	P value summary	ns			WT	P value summary	ns
			One- or two-tailed P value?	Two-tailed					One- or two-tailed P value?	Two-tailed						Significantly different (P < 0.05)?	No				Significantly different (P < 0.05)?	No
			t, df	t=0.4235, df=4					t, df	t=0.1145, df=4						One- or two-tailed P value?	Two-tailed				One- or two-tailed P value?	Two-tailed
																t, df	t=0.9823, df=4				t, df	t=0.9557, df=4
