# Supplementary material for: T3SS translocon induces pyroptosis by direct interaction with NLRC4/NAIP inflammasome
Source: eLife. 2025 Feb 14;13:RP100820. doi: 10.7554/eLife.100820 (PMC11828483; doi:10.7554/eLife.100820)
Supplement: Figure 2—source data 3. [file elife-100820-fig2-data3.xlsx]

## Sheet: Sheet1
	Figure 2B										Figure 2C
	CFU		WT	ΔeseB-D	ΔescA	ΔeseB	ΔeseC	ΔeseD			CFU		WT	ΔeseB-D	ΔescA	ΔeseB	ΔeseC	ΔeseD
		Rep. 1	140140	140800	114400	125400	145200	101200				Rep. 1	1683000	1936000	1562000	1826000	1936000	1540000
		Rep. 2	95700	149600	125400	158400	143000	165000				Rep. 2	2101000	2244000	1606000	2090000	2134000	1804000
		Rep. 3	97900	127600	123200	132000	156200	121000				Rep. 3	1925000	1826000	1738000	2200000	2222000	1782000
		Mean	111247	139333	121000	138600	148133	129067				Mean	1903000	2002000	1635333	2038667	2097333	1708667
		Std. Deviation	25047	11073	5821	17462	7072	32656				Std. Deviation	209867	216675	91593	192212	146483	146483
	One-way ANOVA	Dunnett's multiple comparisons test	Mean Diff.	95.00% CI of diff.	Below threshold?	Summary	Adjusted P Value				One-way ANOVA	Dunnett's multiple comparisons test	Mean Diff.	95.00% CI of diff.	Below threshold?	Summary	Adjusted P Value
		WT vs. ΔeseB-D	-28087	-73501 to 17328	No	ns	0.3071					WT vs. ΔeseB-D	-99000	-508443 to 310443	No	ns	0.9265
		WT vs. ΔescA	-9753	-55168 to 35661	No	ns	0.9526					WT vs. ΔescA	267667	-141776 to 677109	No	ns	0.2641
		WT vs. ΔeseB	-27353	-72768 to 18061	No	ns	0.3284					WT vs. ΔeseB	-135667	-545109 to 273776	No	ns	0.798
		WT vs. ΔeseC	-36887	-82301 to 8528	No	ns	0.1273					WT vs. ΔeseC	-194333	-603776 to 215109	No	ns	0.5328
		WT vs. ΔeseD	-17820	-63235 to 27595	No	ns	0.6868					WT vs. ΔeseD	194333	-215109 to 603776	No	ns	0.5328
	Figure 2D
	Cell death (%)			2 h						4 h
		E. tarda	-	WT	ΔeseB-D	ΔescA	ΔeseB	ΔeseC	ΔeseD	WT	ΔeseB-D	ΔescA	ΔeseB	ΔeseC	ΔeseD
		Rep. 1	3.97389	24.6381	0.028385	15.0156	1.19217	2.98041	3.34942	32.2736	5.39313	20.4939	3.17911	3.17911	3.29265
		Rep. 2	3.97389	25.4329	0.227079	14.2208	2.95203	1.90179	4.79705	32.5575	3.03718	19.8127	3.17911	2.83849	3.74681
		Rep. 3	0	26.398	1.07863	13.6815	0.936702	1.93017	3.51973	32.4439	6.04598	20.1817	3.54811	2.83849	3.9455
		Mean	2.649	25.49	0.4447	14.31	1.694	2.271	3.889	32.43	4.825	20.16	3.302	2.952	3.662
		Std. Deviation	2.294	0.8813	0.5579	0.6711	1.097	0.6147	0.7912	0.1429	1.583	0.341	0.213	0.1967	0.3347
		One-way ANOVA	Dunnett's multiple comparisons test	Mean Diff.	95.00% CI of diff.	Below threshold?	Summary	Adjusted P Value
			2 h WT vs. ΔeseB-D	25.04	23.17 to 26.92	Yes	****	<0.0001
			2 h WT vs. ΔescA	11.18	9.312 to 13.06	Yes	****	<0.0001
			2 h WT vs. ΔeseB	23.8	21.92 to 25.67	Yes	****	<0.0001
			2 h WT vs. ΔeseC	23.22	21.35 to 25.09	Yes	****	<0.0001
			2 h WT vs. ΔeseD	21.6	19.73 to 23.47	Yes	****	<0.0001
		One-way ANOVA	Dunnett's multiple comparisons test	Mean Diff.	95.00% CI of diff.	Below threshold?	Summary	Adjusted P Value
			4 h WT vs. ΔeseB-D	27.6	25.97 to 29.23	Yes	****	<0.0001
			4 h WT vs. ΔescA	12.26	10.63 to 13.89	Yes	****	<0.0001
			4 h WT vs. ΔeseB	29.12	27.49 to 30.75	Yes	****	<0.0001
			4 h WT vs. ΔeseC	29.47	27.84 to 31.10	Yes	****	<0.0001
			4 h WT vs. ΔeseD	28.76	27.13 to 30.39	Yes	****	<0.0001
	Figure 2E
		IL-1β (pg/ml)
		E. tarda	-	WT	ΔeseB-D	ΔescA	ΔeseB	ΔeseC	ΔeseD	WT	ΔeseB-D	ΔescA	ΔeseB	ΔeseC	ΔeseD
		Rep. 1	30.1245	240.5	36.9117	127.833	37.9558	31.1687	37.9558	394.333	47.3534	239.417	40.0442	40.0442	51.5301
		Rep. 2	28.5582	288.167	30.1245	112.667	33.257	29.6024	32.7349	449.583	37.9558	237.25	35.3454	42.1325	45.7871
		Rep. 3	28.0361	240.5	39.5221	91	30.6466	33.257	34.8233	361.833	34.8233	187.417	41.6104	36.9117	45.7871
		Mean	28.91	256.4	35.52	110.5	33.95	31.34	35.17	401.9	40.04	221.4	39	39.7	47.7
		Std. Deviation	1.087	27.52	4.851	18.51	3.704	1.834	2.628	44.36	6.521	29.42	3.26	2.628	3.316
		One-way ANOVA	Dunnett's multiple comparisons test	Mean Diff.	95.00% CI of diff.	Below threshold?	Summary	Adjusted P Value
			2 h WT vs. ΔeseB-D	220.9	188.1 to 253.6	Yes	****	<0.0001
			2 h WT vs. ΔescA	145.9	113.1 to 178.7	Yes	****	<0.0001
			2 h WT vs. ΔeseB	222.4	189.7 to 255.2	Yes	****	<0.0001
			2 h WT vs. ΔeseC	225	192.3 to 257.8	Yes	****	<0.0001
			2 h WT vs. ΔeseD	221.2	188.5 to 254.0	Yes	****	<0.0001
		One-way ANOVA	Dunnett's multiple comparisons test	Mean Diff.	95.00% CI of diff.	Below threshold?	Summary	Adjusted P Value
			4 h WT vs. ΔeseB-D	361.9	309.8 to 414.0	Yes	****	<0.0001
			4 h WT vs. ΔescA	180.6	128.4 to 232.7	Yes	****	<0.0001
			4 h WT vs. ΔeseB	362.9	310.8 to 415.0	Yes	****	<0.0001
			4 h WT vs. ΔeseC	362.2	310.1 to 414.3	Yes	****	<0.0001
			4 h WT vs. ΔeseD	354.2	302.1 to 406.3	Yes	****	<0.0001
