# Supplementary material for: T3SS translocon induces pyroptosis by direct interaction with NLRC4/NAIP inflammasome
Source: eLife. 2025 Feb 14;13:RP100820. doi: 10.7554/eLife.100820 (PMC11828483; doi:10.7554/eLife.100820)
Supplement: Figure 3—source data 3. [file elife-100820-fig3-data3.xlsx]

## Sheet: Sheet1
	Figure 3B
	Cell death (%)	Extracellular					Intracellular
		Mock	EscA	EseB	EseC	EseD	Mock	EscA	EseB	EseC	EseD
	Rep. 1	12.605	3.43137	8.40336	2.80112	6.93277	1.47059	2.45098	74.6499	9.87395	2.87115
	Rep. 2	0	2.52101	6.5126	2.17087	5.32213	9.59384	0.560224	75.4902	12.465	3.5014
	Rep. 3	3.71149	3.43137	3.92157	4.20168	3.22129	7.14286	0.70028	77.7311	6.93277	4.69188
	Mean	5.439	3.128	6.279	3.058	5.159	6.069	1.237	75.96	9.757	3.688
	Std. Deviation	6.478	0.5256	2.25	1.039	1.861	4.167	1.054	1.593	2.768	0.9246
Figure 3D
	Cell death (%)
		-						Extracellular						Intracellular
		WT	Aim2-KO	NLRC4-KO	ASC-KO	Casp4-KO	GSDMD-KO	WT	Aim2-KO	NLRC4-KO	ASC-KO	Casp4-KO	GSDMD-KO	WT	Aim2-KO	NLRC4-KO	ASC-KO	Casp4-KO	GSDMD-KO
	Rep. 1	1.91638	1.82998	0	0.744725	0	6.47646	1.65505	1.66362	2.21082	3.30989	3.37628	1.05024	82.23	83.0145	9.19703	62.8051	82.4522	11.115
	Rep. 2	1.82927	0	1.85709	0	0.266548	0	8.62369	2.74497	4.15635	3.39264	4.08707	1.92543	88.4146	77.3582	8.40113	61.6467	79.9645	8.31437
	Rep. 3	0	1.24771	2.47612	0.330989	0.799645	0.08752	5.66202	1.58044	3.27202	3.30989	4.88672	1.75039	84.9303	88.2549	14.5914	66.9425	92.4034	6.6515
	Mean	1.249	1.026	1.444	0.3586	0.3554	2.188	5.314	1.996	3.213	3.337	4.117	1.575	85.19	82.88	10.73	63.8	84.94	8.694
	Std. Deviation	1.082	0.9349	1.289	0.3731	0.4072	3.714	3.497	0.6497	0.9741	0.04777	0.7557	0.4631	3.101	5.45	3.368	2.784	6.582	2.256
	One-way ANOVA	Dunnett's multiple comparisons test	Mean Diff.	95.00% CI of diff.	Below threshold?	Summary	Adjusted P Value
		Intra. WT vs. Aim2-KO	2.316	-7.679 to 12.31	No	ns	0.937
		Intra. WT vs. NLRC4-KO	74.46	64.47 to 84.46	Yes	****	<0.0001
		Intra. WT vs. ASC-KO	21.39	11.40 to 31.39	Yes	***	0.0002
		Intra. WT vs. Casp4-KO	0.2516	-9.744 to 10.25	No	ns	>0.9999
		Intra. WT vs. GSDMD-KO	76.5	66.50 to 86.49	Yes	****	<0.0001
Figure 3E
	Cell death (%)	-			Extracellular			Intracellular
		Null	NLRP3-KD	Casp1-KD	Null	NLRP3-KD	Casp1-KD	Null	NLRP3-KD	Casp1-KD
	Rep. 1	4.2957	0	2.50855	10.989	3.5753	6.72748	92.7073	99.8917	51.1973
	Rep. 2	0	4.65872	0.798176	8.19181	3.46696	5.24515	83.5165	92.3077	43.6716
	Rep. 3	2.3976	1.95016	0	3.2967	6.28386	6.38541	89.4106	94.9079	47.2064
	Mean	2.231	2.203	1.102	7.493	4.442	6.119	88.54	95.7	47.36
	Std. Deviation	2.153	2.34	1.282	3.894	1.596	0.7762	4.656	3.854	3.765
	One-way ANOVA	Dunnett's multiple comparisons test	Mean Diff.	95.00% CI of diff.	Below threshold?	Summary	Adjusted P Value
		Intra. Null vs. NLRP3-KD	-7.158	-16.77 to 2.453	No	ns	0.1304
		Intra. Null vs. Casp1-KD	41.19	31.58 to 50.80	Yes	****	<0.0001
Figure 3F											Figure 3G
												Cell death (%)	-			Extracellular			Intracellular
		Relative mRNA expression	Ctrl	Scramble	NAIP-shRNA								Ctrl	Scramble	NAIP-shRNA	Ctrl	Scramble	NAIP-shRNA	Ctrl	Scramble	NAIP-shRNA
	Rep. 1		0.832157	1.02133	0.0430414						Rep. 1		4.89796	0	0.444939	5.53936	0.817439	4.22692	82.1574	77.3297	51.5017
	Rep. 2		1.16837	0.859612	0.305963						Rep. 2		1.74927	0.108992	1.66852	5.01458	4.08719	2.00223	76.793	78.1471	49.8332
	Rep. 3		1.02853	1.10277	0.346988						Rep. 3		0	1.85286	0	3.61516	4.68665	1.33482	83.5568	78.4741	52.614
		Mean	1.01	0.9946	0.232							Mean	2.216	0.654	0.7045	4.723	3.197	2.521	80.84	77.98	51.32
		Std. Deviation	0.1689	0.1238	0.1649							Std. Deviation	2.482	1.04	0.864	0.9947	2.083	1.514	3.57	0.5895	1.4
	One-way ANOVA	Dunnett's multiple comparisons test	Mean Diff.	95.00% CI of diff.	Below threshold?	Summary	Adjusted P Value					One-way ANOVA	Dunnett's multiple comparisons test	Mean Diff.	95.00% CI of diff.	Below threshold?	Summary	Adjusted P Value
		Ctrl vs. Scramble	0.01511	-0.3446 to 0.3748	No	ns	0.9895						Intra. Ctrl vs. Scramble	2.852	-2.385 to 8.089	No	ns	0.2767
		Ctrl vs. NAIP-shRNA	0.7777	0.4179 to 1.137	Yes	**	0.0015						Intra. Ctrl vs. NAIP-shRNA	29.52	24.28 to 34.76	Yes	****	<0.0001
