# Supplementary material for: T3SS translocon induces pyroptosis by direct interaction with NLRC4/NAIP inflammasome
Source: eLife. 2025 Feb 14;13:RP100820. doi: 10.7554/eLife.100820 (PMC11828483; doi:10.7554/eLife.100820)
Supplement: Figure 4—source data 9. [file elife-100820-fig4-data9.xlsx]

## Sheet: Sheet1
	Figure 4D
	Cell death (%)		EseB
		Mock	WT	ΔT6R	ΔT4R	NT	CT
	Rep. 1	5.33618	91.5155	9.55176	6.72359	13.714	91.5155
	Rep. 2	7.04376	92.1558	15.7417	11.5261	20.8645	92.0491
	Rep. 3	11.0992	83.0843	19.1569	1.65422	25.0267	84.5784
	Mean	7.826	88.92	14.82	6.635	19.87	89.38
	Std. Deviation	2.96	5.063	4.869	4.937	5.722	4.168
	One-way ANOVA	Dunnett's multiple comparisons test	Mean Diff.	95.00% CI of diff.	Below threshold?	Summary	Adjusted P Value
		WT vs. Mock	81.09	69.96 to 92.23	Yes	****	<0.0001
		WT vs. ΔT6R	74.1	62.97 to 85.24	Yes	****	<0.0001
		WT vs. ΔT4R	82.28	71.15 to 93.42	Yes	****	<0.0001
		WT vs. NT	69.05	57.91 to 80.19	Yes	****	<0.0001
		WT vs. CT	-0.4625	-11.60 to 10.67	No	ns	>0.9999
