# Supplementary material for: T3SS translocon induces pyroptosis by direct interaction with NLRC4/NAIP inflammasome
Source: eLife. 2025 Feb 14;13:RP100820. doi: 10.7554/eLife.100820 (PMC11828483; doi:10.7554/eLife.100820)
Supplement: Figure 5—source data 5. [file elife-100820-fig5-data5.xlsx]

## Sheet: Sheet1
Figure 5D	Cell death (%)
		Mock	EspAMc	EspAMcΔT6R	SseBSe	SseBSeΔT7R	EspAAv	EspAAvΔT6R	HypPCv	HypPCvΔT6R	EspAVp	EspAVpΔT6R
	Rep.1	15.1246	60.4202	19.8862	52.5132	19.3354	78.8707	33.5029	58.0123	17.0238	77.6547	18.0984
	Rep.2	18.1495	66.7529	19.6515	61.7957	20.8072	85.9198	34.6888	62.9996	19.4077	85.1734	19.6394
	Rep.3	19.4378	71.6982	23.775	58.241	23.0948	85.9409	38.5143	62.9033	21.4393	75.8006	22.2731
	Mean	17.57	66.29	21.1	57.52	21.08	83.58	35.57	61.31	19.29	79.54	20
	Std. Deviation	2.214	5.653	2.316	4.683	1.894	4.076	2.619	2.852	2.21	4.963	2.111
	EspAMcΔT6R	Unpaired t test			SseBSeΔT7R	Unpaired t test			EspAAvΔT6R	Unpaired t test			HypPCvΔT6R	Unpaired t test			EspAVpΔT6R	Unpaired t test
	vs.	P value	0.0002		vs.	P value	0.0002		vs.	P value	<0.0001		vs.	P value	<0.0001		vs.	P value	<0.0001
	EspAMc	P value summary	***		SseBSe	P value summary	***		EspAAv	P value summary	****		HypPCv	P value summary	****		EspAVp	P value summary	****
		Significantly different (P < 0.05)?	Yes			Significantly different (P < 0.05)?	Yes			Significantly different (P < 0.05)?	Yes			Significantly different (P < 0.05)?	Yes			Significantly different (P < 0.05)?	Yes
		One- or two-tailed P value?	Two-tailed			One- or two-tailed P value?	Two-tailed			One- or two-tailed P value?	Two-tailed			One- or two-tailed P value?	Two-tailed			One- or two-tailed P value?	Two-tailed
		t, df	t=12.81, df=4			t, df	t=12.49, df=4			t, df	t=17.16, df=4			t, df	t=20.17, df=4			t, df	t=19.12, df=4
